# Supplementary material
Source: MDPI journal article supplement (https://www.mdpi.com/2073-4433/10/12/768)
Supplement: s1 [file s1]

# Unprecedented Rainfall and Moisture Patterns during El Niño 2016 in the Eastern Pacific and Tropical Andes: Northern Perú and Ecuador

## Supplementary Figures

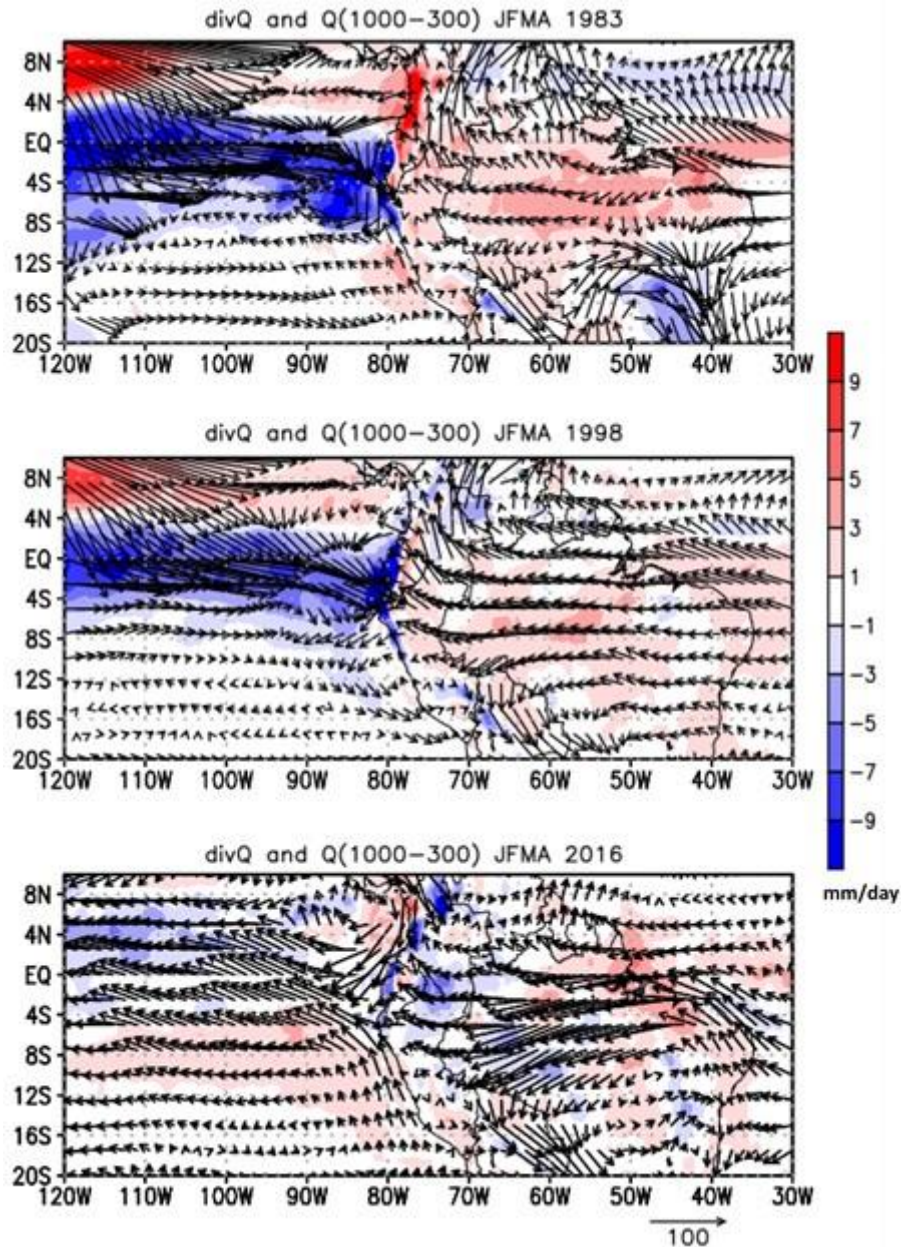

**Figure S1:** January through April (JFMA) composite of (a) the vertically integrated water vapor transport ( $\vec{Q}$ ) anomalies ( $\text{kg m}^{-1} \text{s}^{-1}$ ; in vectors) and its convergence ( $-\nabla \cdot \vec{Q}$ ) ( $\text{mm/day}$ ; in shaded) for El Niño 1983, 1998 and 2016. The  $\vec{Q}$  and  $-\nabla \cdot \vec{Q}$  were integrated between 1000 and 300 hPa. The shading also indicates significant values at the 95% level using the Student's t-test
